# Supplementary material for: Brussowvirus SW13 Requires a Cell Surface-Associated Polysaccharide To Recognize Its Streptococcus thermophilus Host
Source: PubMed Central journal article supplement (PMC8752142; doi:10.1128/aem.01723-21), 2022-01-11

**Table S1:** List of strains, plasmids and bacteriophage used in this study.

| <b>Strains</b>                                 | <b>Relevance</b>                                                                                    |
|------------------------------------------------|-----------------------------------------------------------------------------------------------------|
| <i>S. thermophilus</i> UCCSt50                 | Host strain for phage SW13                                                                          |
| <i>S. thermophilus</i> UCCSt50::pNZ44-acrIIA6  | Host strain harbouring the control vector                                                           |
| <i>S. thermophilus</i> B1                      | Phage insensitive derivative of <i>S. thermophilus</i> UCCSt50                                      |
| <i>S. thermophilus</i> B2                      | Phage insensitive derivative of <i>S. thermophilus</i> UCCSt50                                      |
| <i>S. thermophilus</i> B4                      | Phage insensitive derivative of <i>S. thermophilus</i> UCCSt50                                      |
| <i>S. thermophilus</i> B9                      | Phage insensitive derivative of <i>S. thermophilus</i> UCCSt50                                      |
| <i>S. thermophilus</i> B1::pNZ44-acrIIA6       | <i>S. thermophilus</i> B1 harbouring the control plasmid                                            |
| <i>S. thermophilus</i> B1::pNZ44-06955         | <i>S. thermophilus</i> B1 harbouring the complementing plasmid                                      |
| <i>S. thermophilus</i> B1 $\Delta$ pNZ44-06955 | Cured derivative of the complementing strain                                                        |
| <b>Plasmids</b>                                |                                                                                                     |
| pNZ44-acrIIA6                                  | Control vector - pNZ44 harbouring an anti-CRISPR homolog                                            |
| pNZ44-06955                                    | pNZ44-acrIIA6 harbouring native <i>orf06955</i> from UCCSt50                                        |
| pHTP9 (NZYTech, Portugal)                      | Gfp fusion vector used to produce recombinant Gfp-RBP-module <sub>SW13</sub>                        |
| <b>Phage</b>                                   |                                                                                                     |
| SW13 (Accession number MH892362)               | <i>Brussowvirus</i> of <i>S. thermophilus</i> UCCSt50 used for BIM generation and subsequent assays |

**Table S2:** List of primers used in this study. Restriction sites are highlighted by bold text. The TEV cleavage site incorporated into the Gfp fusion CBD is underlined.

| Primer       | Sequence 5' – 3'                                            |
|--------------|-------------------------------------------------------------|
| 06955F       | aaaaa <b>actgc</b> agaggaggtcaccttgagagtttaataataatc        |
| 06955R       | aaaaaa <b>actag</b> ttattcactctccttcataaag                  |
| RBP-module F | tcagcaagggtgaggg <b>aaac</b> ctgtatttcagggcagtaataacggtggcc |
| RBP-module R | tcagcggagctgaggttatatgtcttcaattgc                           |
| pNZ44F       | ctaatgtcaactaacctgccccg                                     |
| pNZ44R       | gctttatcaactgctgct                                          |

**Table S3:** Detail of the CRISPR arrays of the parent strain UCCSt50 and its four derived BIMs. Whilst no spacer acquisition against phage SW13 was observed, modifications were noted in the CRISPR3 array including deletions and single spacer uptake with 100% identity (Blastn) to *L. lactis* derived cloning vectors.

| Strain                         | C1 | C2 | C3 | Var     | Significance                                              |
|--------------------------------|----|----|----|---------|-----------------------------------------------------------|
| <i>S. thermophilus</i> UCCSt50 | 36 | 1  | 20 | N/A     | N/A                                                       |
| <i>S. thermophilus</i> B1      | 36 | 1  | 20 | 0       | N/A                                                       |
| <i>S. thermophilus</i> B2      | 36 | 1  | 21 | +1      | 100% identity to <i>L. lactis</i> derived cloning vectors |
| <i>S. thermophilus</i> B4      | 36 | 1  | 17 | -3      | Deletion of 3 spacers present in the parent strain        |
| <i>S. thermophilus</i> B9      | 36 | 1  | 18 | -3 / +1 | 100% identity <i>L. lactis</i> derived cloning vectors    |

**Table S4.** NMR data for *S. thermophilus* UCCSt50 Rgp and its derivatives (600 MHz, 25 °C,  $\delta$  ppm).

| Sugar                |   | H/C 1 | H/C 2 | H/C 3 | H/C 4 | H/C 5 | H/C 6      |
|----------------------|---|-------|-------|-------|-------|-------|------------|
| $\alpha$ -Rha A DPS  | H | 5.09  | 4.10  | 3.90  | 3.50  | 3.79  | 1.30       |
|                      | C | 100.9 | 78.0  | 70.7  | 73.2  | 70.7  | 17.7       |
| $\alpha$ -Glc B DPS  | H | 5.01  | 3.55  | 3.76  | 3.47  | 4.16  | 3.70; 3.94 |
|                      | C | 99.1  | 72.4  | 73.9  | 70.7  | 72.0  | 67.5       |
| $\alpha$ -Rha C DPS  | H | 4.93  | 4.03  | 3.92  | 3.47  | 3.74  | 1.30       |
|                      | C | 100.1 | 79.9  | 71.0  | 73.3  | 70.0  | 17.7       |
| $\beta$ -Gal D OS    | H | 4.66  | 3.54  | 3.67  | 3.92  | 3.67  | 3.76; 3.79 |
|                      | C | 104.7 | 72.7  | 73.9  | 69.7  | 76.3  | 62.0       |
| $\alpha$ -Rha E OS   | H | 4.95  | 4.09  | 3.80  | 3.45  | 3.75  | 1.27       |
|                      | C | 103.3 | 71.1  | 71.1  | 73.1  | 70.3  | 17.7       |
| $\alpha$ -Rha F OS   | H | 5.07  | 3.95  | 4.11  | 3.75  | 3.93  | 1.37       |
|                      | C | 99.1  | 79.6  | 71.0  | 81.7  | 68.8  | 18.0       |
| anhMan G OS          | H | 5.09  | 3.83  | 4.20  | 4.17  | 3.95  | 3.68; 3.77 |
|                      | C | 90.5  | 84.9  | 84.8  | 76.6  | 84.2  | 61.6       |
| $\alpha$ -Rha A PS   | H | 5.07  | 4.28  | 3.97  | 3.58  | 3.80  | 1.32       |
|                      | C | 100.7 | 77.7  | 79.4  | 72.7  | 71.0  | 17.9       |
| $\alpha$ -Glc B PS   | H | 4.98  | 3.51  | 3.71  | 3.58  | 4.20  | 3.94; 3.94 |
|                      | C | 99.1  | 72.6  | 74.0  | 70.1  | 71.5  | 67.3       |
| $\alpha$ -Rha C PS   | H | 4.93  | 4.06  | 3.92  | 3.48  | 3.75  | 1.34       |
|                      | C | 100.8 | 79.4  | 71.3  | 73.4  | 70.1  | 18.1       |
| $\beta$ -Gal D PS    | H | 4.64  | 3.54  | 3.66  | 3.92  | 3.67  | 3.77; 3.77 |
|                      | C | 104.9 | 72.9  | 74.0  | 69.7  | 76.3  | 62.1       |
| $\alpha$ -Rha E PS   | H | 4.86  | 4.07  | 3.78  | 3.44  | 3.75  | 1.29       |
|                      | C | 103.7 | 71.3  | 71.3  | 73.3  | 70.1  | 18.1       |
| $\alpha$ -Rha F PS   | H | 5.08  | 3.79  | 3.85  | 3.72  | 4.08  | 1.32       |
|                      | C | 100.7 | 81.4  | 71.0  | 81.9  | 68.8  | 17.9       |
| $\beta$ -GlcNAc G PS | H | 4.76  | 3.73  | 3.63  | 3.47  | 3.47  | 3.76; 3.96 |
|                      | C | 103.6 | 57.0  | 82.7  | 70.2  | 76.9  | 62.1       |

**Fig. S1**  $^1\text{H}$ - $^{13}\text{C}$  HSQC spectrum of the *S. thermophilus* UCCSt50 Rgp.

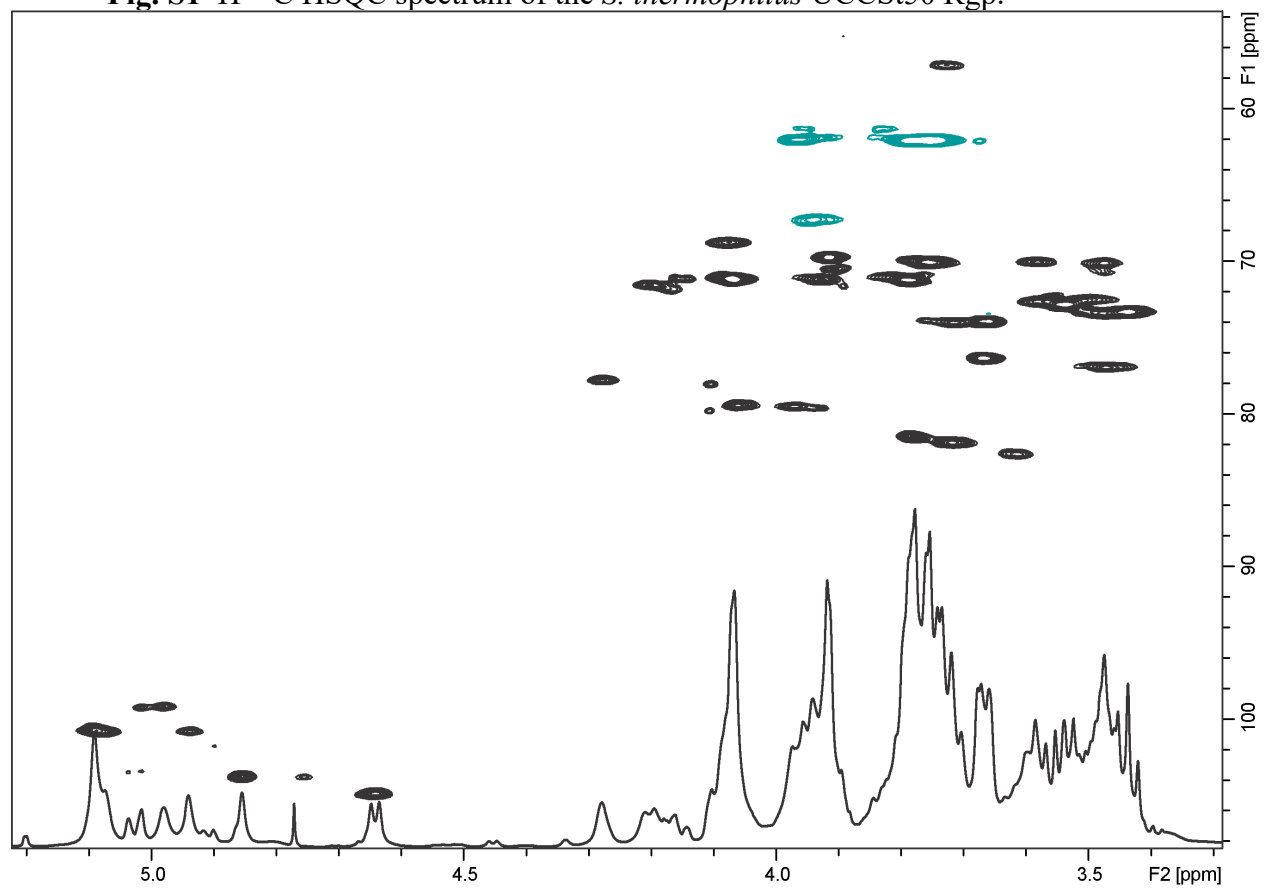

**Fig. S2**  $^1\text{H}$ - $^{13}\text{C}$  HSQC spectrum of the Rgp from *S. thermophilus* UCCSt50 B1mutant.

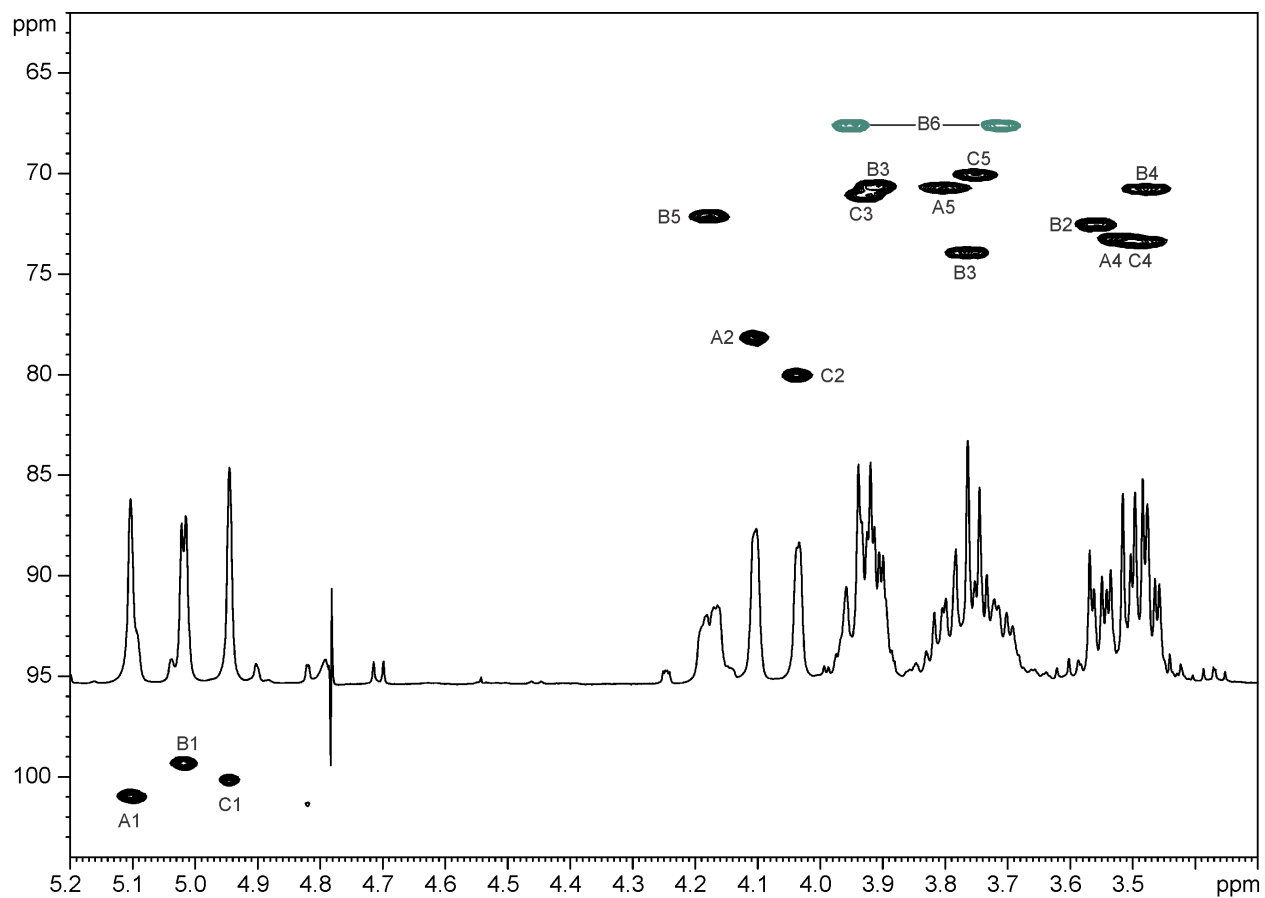

Supplement: aem.01723-21-s0001.pdf [file aem.01723-21-s0001.pdf]
